1 **Large-scale in-cell photocrosslinking at single residue resolution reveals the molecular**  
2 **basis for glucocorticoid receptor regulation by immunophilins**

3

4 Asat Baischew<sup>†</sup>, Sarah Engel<sup>†</sup>, Thomas M. Geiger and Felix Hausch\*

5 Department of Chemistry, Technical University Darmstadt, Darmstadt, Germany

6 \*Correspondence to: [felix.hausch@tu-darmstadt.de](mailto:felix.hausch@tu-darmstadt.de)

7 <sup>†</sup>These authors contributed equally: Asat Baischew, Sarah Engel

8 **Abstract**

9 **The large immunophilins FKBP51 and FKBP52 play key roles in the Hsp90-mediated**  
10 **maturation of steroid hormone receptors, which is crucial for stress-related disorders and**  
11 **correct sexual embryonic development, respectively<sup>1-3</sup>. A prominent regulatory target is**  
12 **the glucocorticoid receptor (GR), whose activation is repressed by FKBP51<sup>4,5</sup> and**  
13 **facilitated by FKBP52<sup>6,7</sup>. Despite their vital roles, the molecular modes of action of**  
14 **FKBP51 and FKBP52 are poorly understood since the transient key states of FKBP-**  
15 **mediated GR-regulation have remained experimentally elusive. Here we present the**  
16 **architecture and functional annotation of FKBP51-, FKBP52- and p23-containing Hsp90-**  
17 **apoGR preactivation complexes, trapped by systematic incorporation of photoreactive**  
18 **amino acids<sup>8,9</sup> inside human cells. The identified crosslinking sites depended on a**  
19 **functional Hsp90 chaperone cycle, were disrupted by GR activation, and clustered in**  
20 **characteristic patterns, defining the relative orientation and contact surfaces within the**  
21 **FKBP/p23-apoGR complexes. Strikingly, GR binding to the FKBP<sup>FK1</sup> but not the**  
22 **FKBP<sup>FK2</sup> domains were modulated by FKBP ligands, explaining the lack of FKBP51-**  
23 **mediated GR derepression by certain classes of FKBP ligands. These findings show how**  
24 **FKBP51 and FKBP52 differentially interact with the apoGR ligand binding domain, they**  
25 **explain the differentiated pharmacology of FKBP51 ligands, and provide a structural**  
26 **basis for the development of FKBP ligands with higher efficacy.**

27 Steroid hormone receptors are key endocrine effectors that rely on the Hsp90 chaperone  
28 machinery<sup>10,11</sup>, assisted by a various co-chaperones. Among these, FK506-binding Proteins 51  
29 and 52 (FKBP51 and FKBP52) are thought to fine-tune the final steps of steroid hormone  
30 receptor maturation. Their physiological importance has become evident by transgenic studies  
31<sup>12</sup>, where FKBP52 reduction or deficiency severely compromised steroid hormone signaling in  
32 cells<sup>13,14</sup> and sexual embryonic development and glucose homeostasis in mice<sup>12</sup>. Conversely,  
33 FKBP51 knockout mice were protected from diet-induced obesity<sup>4,15</sup> or various forms of  
34 chronic pain<sup>16</sup> and displayed an enhanced stress coping behavior<sup>17,18</sup>. FKBP51 expression is  
35 robustly induced by steroid hormones and various types of stress in cells, mice and humans,  
36 further underscoring the prominent role of FKBP51 as a key regulator of steroid hormone  
37 receptors and stress physiology<sup>19</sup>. The importance of FKBP51 (encoded by the *fkbp5* gene) for  
38 human health is supported by FKBP51-hyperinducing single nucleotide polymorphisms that  
39 have repeatedly been associated with stress-related disorders<sup>20</sup>. Collectively, FKBP51 has  
40 emerged as a potential target to treat stress-related disorders, obesity-induced diabetes, or  
41 chronic pain<sup>2,21</sup>. Despite substantial recent structural advances on Hsp90-mediated nuclear  
42 hormone maturation<sup>22-26</sup>, a detailed mechanistic understanding of the key steps of GR  
43 regulation by the large FKBP co-chaperones has remained elusive, in part due to difficulties to  
44 purify or functionally reconstitute FKBP51 and FKBP52 together with GR in defined  
45 biochemical systems<sup>27,28</sup>. Here we present a detailed molecular description of FKBP51- and  
46 FKBP52-containing Hsp90-GR complexes in an authentic cellular environment, that captures  
47 GR in the state of regulation by FKBP51 and FKBP52 immediately prior to activation.

48

#### 49 **FKBP51 and FKBP52 have large and defined GR interaction interfaces**

50 To interrogate the architecture of the FKBP51/52-Hsp90-GR heterocomplexes in mammalian  
51 cells (HEK293), we resorted to amber suppression<sup>8,9</sup> to site-specifically incorporate the  
52 photoreactive unnatural amino acid para-benzoyl phenylamine (pBpa) at defined positions in

53 different members of the complexes. This was followed by life cell irradiation and analysis of  
54 photocrosslinking adducts.

55 As a technical proof-of-concept, we first investigated amino acid positions in the TPR domain  
56 of FKBP51 (FKBP51<sup>TPR</sup>), which are predicted to mediate key contacts to the C-terminal domain  
57 of Hsp90 (Hsp90<sup>CTD</sup>)<sup>29</sup>. Indeed, several positions in FKBP51<sup>TPR</sup> were identified, which upon  
58 UV irradiation produced higher- molecular weight complexes corresponding to crosslinked  
59 FKBP51-Hsp90 heterodimers (Extended Data Fig. 1a). This included positions previously  
60 shown to be in tight contact with Hsp90 (Extended Data Fig. 1d and e)<sup>29</sup> as well as positions  
61 poised to interact with the unresolved linker proceeding the C-terminal MEEVD motif of Hsp90  
62 (Hsp90<sup>MEEVD</sup>, Extended Data Fig. 1b).

63 We then set out to map the interaction interface of FKBP51 with GR, individually incorporating  
64 pBpa into all surface-exposed amino acid positions of FKBP51<sup>30</sup>. Out of the 216 tested sites,  
65 46 crosslinks of FKBP51 to the GR were detected by Western Blot (exemplarily shown in Fig.  
66 1a and fully shown in Extended Data Fig. 2a). These segregated into well-defined interaction  
67 sites spanning all three domains of FKBP51. The GR-reactive amino acid positions clustered  
68 around the FK506-binding site (e.g., R73, E75, Q85, P120) of the FK1 domain, the  $\beta$ 1- $\beta$ 2 loop  
69 (e.g., Y159), the tip of helix  $\alpha$ 1 (e.g., E207) and the  $\alpha$ 1- $\beta$ 4 loop (e.g., Q210) of the FK2 domain,  
70 the FK2-TPR linker (e.g., W257), and the  $\alpha$ 2- $\alpha$ 3 loop (e.g., E301) and helix  $\alpha$ 4 (e.g., K342) of  
71 the TPR domain (Fig. 1b and Extended Data Fig. 2c). Mapping of the crosslinking sites on the  
72 FKBP51 structure<sup>30</sup> revealed a large and continuous interaction surface on adjacent sides of  
73 the FK1, FK2 and the tip of the TPR domain (Fig. 1b). Strikingly, not a single crosslink was  
74 detected on the opposite side of FKBP51, indicating the presence of a well ordered and  
75 reasonably populated FKBP51-Hsp90-GR complex inside human cells.

76 Next, we similarly characterized the interface of FKBP52 with GR (Fig. 1c and Extended Data  
77 Fig. 2b). Out of a library of 153 pBpa mutants, 29 GR-photoreactive positions between FKBP52  
78 and GR were detected. Again, these clearly segregated on one side of the FK1, FK2 and part of

79 the TPR domains of FKBP52, whereas no crosslinks were detected on the other side (Fig. 1d).  
80 To our surprise, the overall GR-crosslinking patterns of FKBP51 and FKBP52 were almost  
81 identical (Fig. 1b and d, Extended Data Fig. 2c), revealing a common basal binding mode of  
82 these co-chaperones with GR.  
83 The broad orientation of this binding mode became apparent when mapping the crosslinks on  
84 the structure of FKBP51 in complex with Hsp90 (Fig. 1e)<sup>29</sup>. Notably, all GR-reactive positions  
85 on FKBP51 are oriented towards the GR binding site of Hsp90 that was suggested from recent  
86 cryo-EM structures of GR-Hsp90 complexes<sup>22,23</sup>. While it has been clear from these structures  
87 that GR and/or FKBP51 have to rearrange in a FKBP51-Hsp90-GR complex, the details of this  
88 rearrangement have been unclear. Our data support a model where minor movements of  
89 FKBP51 or FKBP52 away from the core of Hsp90 are sufficient to functionally interact with  
90 GR and represent the predominant conformation of FKBP51 and FKBP52 in FKBP-GR-  
91 containing complexes inside cells.

92

### 93 **FKBP51 wraps around the GR ligand binding domain inside cells**

94 To further refine the orientation of GR in the FKBP51-Hsp90-GR complex we generated<sup>31</sup> and  
95 screened a pBpa mutant library (215 mutants) covering the putative surface of full-length GR,  
96 including 42 surface-exposed amino acid positions in the GR ligand binding domain (GR<sup>LBD</sup>),  
97 24 residues in the DNA-binding domain, and 149 residues in the structurally uncharacterized  
98 N-terminal part of GR. Several FKBP51-reactive crosslinks were identified in the GR<sup>LBD</sup> (Fig.  
99 2a), while none were observed in the N-terminal parts (Extended Data Fig. 3), confirming the  
100 GR<sup>LBD</sup> as the relevant interaction domain for FKBP51 in cells. Within the GR<sup>LBD</sup>, one  
101 interaction hotspot centered around helix  $\alpha$ 12 (e.g., T744, E755, and N768, Fig. 2b and  
102 Extended Data Fig. 4a and b). Mapping the crosslinks on the structure of the GR<sup>LBD</sup>-Hsp90  
103 complex<sup>23</sup> revealed another crosslinking hot spot on the other side of the GR<sup>LBD</sup> (e.g., R614,  
104 R655, and S659, Fig. 2b), which are located at the tip of helix  $\alpha$ 5 and in the  $\alpha$ 7- $\alpha$ 8 loop. These

105 findings, especially for N768 as the strongest GR→FKBP51 crosslink observed, require the  
106 GR<sup>LBD</sup> to rearrange compared to the orientation observed in the structure of the Hsp90-GR  
107 complex. We propose a clockwise rotation (viewed from Fig. 2b left) to satisfy all crosslinks  
108 observed. The full set of GR→FKBP51 crosslinks reveals a complex, where FKBP51 wraps  
109 around the GR<sup>LBD</sup>, specifically from helix  $\alpha$ 12 around helix  $\alpha$ 3 and the  $\alpha$ 1- $\alpha$ 3 loop to reach the  
110 tip of helix  $\alpha$ 5 and the  $\alpha$ 7- $\alpha$ 8 loop (Extended Data Fig. 4b).

111

### 112 **Exploration of p23-GR contacts**

113 With the GR single point mutant library in hand, we also explored crosslinks of GR with the  
114 Hsp90 co-chaperone p23, which is reported to be essential for GR maturation<sup>32</sup>. Numerous  
115 GR→p23 crosslinks were observed that clustered on the GR (Fig. 2d and Extended Fig. 4c),  
116 e.g., at positions Y648, R655, M691, I694, N707, W711, and Y716). This pattern fits  
117 remarkably well to a recent cryo-EM structure of the p23-Hsp90-GR<sup>LBD</sup> complex<sup>23</sup> (Figure  
118 2e). Some GR<sup>LBD</sup>→FKBP51 crosslinks (R614, R655 and S659) (Fig. 2b) are suspiciously close  
119 or even identical to GR<sup>LBD</sup>→p23 interaction sites. This suggests that FKBP51 may compensate  
120 for some of the GR-p23 contacts lost due to the GR rearrangement postulated above.

121

### 122 **Both FKBP51 and p23 interact with apo-GR<sup>LBD</sup> in an Hsp90-dependent manner**

123 To further define the functional characteristics of the FKBP51-, FKBP52-, and p23-GR-Hsp90  
124 complexes in cells we used a selected set crosslinking positions as intracellular proximity  
125 sensors. Treatment of cells expressing pBpa-incorporating FKBP51 mutants (at D68, E75 or  
126 Q210) with the Hsp90 inhibitor Geldanamycin abrogated crosslinks to GR in all cases (Fig. 3a),  
127 strongly indicating that the observed intracellular FKBP51-Hsp90-GR complex depended on a  
128 functional Hsp90 machinery. Similar results were observed for FKBP52 (Fig. 3b). Next, we  
129 explored the effect of GR activation on selected FKBP crosslinks. Stimulation with the GR  
130 agonist Dexamethasone (Dex) induced rapid dissociation of the FKBP51-GR and FKBP52-GR

131 complexes (Fig. 3c and d). The latter was surprising since FKBP52 has been thought to enter  
132 GR-Hsp90 complex after GR activation, possibly by replacing FKBP51<sup>33</sup>. Our findings  
133 unambiguously show that both FKBP51 and FKBP52 bind to GR in the apo form, prior to activation. Given  
134 the important role of helix  $\alpha 12$  of GR in complexing FKBP51 (Fig. 2), we treated cells  
135 expressing a representative set of FKBP51 pBpa mutants with the GR antagonist Mifepristone  
136 (RU486), which is known to induce a GR conformation with a rearranged helix  $\alpha 12$ <sup>34</sup>. Like  
137 Dexamethasone, Mifepristone completely disrupted all FKBP51 $\rightarrow$ GR and FKBP52 $\rightarrow$ GR  
138 crosslinks (Extended Data Fig. 5a and b), indicating that the specific conformation of helix  $\alpha 12$   
139 is not important for dissociation of the FKBP-GR complexes in cells. The ligand sensitivity  
140 profile of the FKBP51-Hsp90-GR complex was confirmed by reverse crosslinks using selected  
141 GR mutants as proximity sensors (Extended Data Fig. 5c).

142 We also investigated ligand-sensitivity of GR crosslinks to p23. Stimulation with  
143 Geldanamycin, Dexamethasone or Mifepristone disrupted or severely compromised all  
144 GR $\rightarrow$ p23 crosslinks (Fig. 3e), suggesting that p23 too preferentially bound apoGR in a Hsp90-  
145 dependent manner.

146 The availability of intracellular GR activation-sensitive sensors allowed us to investigate the  
147 potency of GR agonists for GR activation in a subcomplex-resolved manner in cells. Using  
148 GR<sup>R655pBpa</sup> co-expressed with FKBP51 or FKBP52 and ELISA as a readout, Dex titration  
149 revealed an apparent EC<sub>50</sub> for GR activation of ~40 nM when starting from a GR complex  
150 containing FKBP52 (Fig. 3d). About 5-fold higher Dex concentrations were needed to activate  
151 GR from a FKBP51-containing GR complex. Similar EC<sub>50</sub> values GR-FKBP51 complexes  
152 were obtained for two other GR mutants (Extended Data Fig. 5h).

153 The ELISA setup was also used to quantify the sensitivity of FKBP $\rightarrow$ GR crosslinks to GR  
154 activation, performed separately for FKBP51 and FKBP52. Using the same photocrosslinking  
155 positions for FKBP51 and FKBP52, FKBP52 $\rightarrow$ GR crosslinks were found to be about 3–3.5-  
156 fold more sensitive to GR activation compared to FKBP51 $\rightarrow$ GR crosslinks (Fig. 3g). While the

157 absolute potencies for GR activation depended on GR expression levels, activation time, and  
158 photocrosslinking position, a similar potency ratio was found for matched FKBP52 vs FKBP51  
159 mutants (Extended Data Fig. 5j and l). This shows that GR activation is facilitated in the context  
160 of a FKBP52-Hsp90-GR complex compared to GR in a FKBP51-Hsp90-GR complex, in line  
161 with the well-documented GR-facilitating effect of FKBP52 and the GR-repressing effect of  
162 FKBP51<sup>35</sup>.

163

### 164 **FKBP<sup>FK1</sup> inhibitors reveal a multi-layered interaction with GR**

165 The molecular basis for the differential effects of FKBP51 and FKBP52 on GR is still unknown.  
166 Several studies pointed towards a key role of the FK1 domains<sup>35-37</sup>, in particular the proline-  
167 rich loop around L/P119 overhanging the FK506-binding site<sup>35</sup>. However, studies on the role  
168 of the FK506-binding site itself have remained controversial<sup>27</sup>. To investigate the role of the  
169 FKBP506-binding site for FKBP-Hsp90-GR complex assembly, we probed representative GR-  
170 photoreactive positions in FKBP51 for sensitivity towards the FKBP51 ligand SAFit2<sup>38</sup>. GR  
171 crosslinking was blunted for numerous positions in FKBP51<sup>FK1</sup> (Fig. 4a, c and Extended Data  
172 Fig. 6a). Strikingly, however, none of the investigated positions in the FK2 or TPR domains of  
173 FKBP51 were affected (Fig. 4b, c and Extended Data Fig. 6a). Similar results were obtained  
174 using the bicyclic FKBP ligand 18<sup>(S)-Me</sup> (Ref 39) (Extended Data Fig. 6b) and when probing  
175 FKBP52 (Extended Data Fig. 6c and d). SAFit2 and the bicyclic FKBP ligand disrupted  
176 crosslinks in FKBP51<sup>FK1</sup> and FKBP52<sup>FK1</sup> at concentrations consistent with their potency to  
177 occupy intracellular FKBP51 or FKBP52<sup>40</sup> (Fig. 4d). This identifies the FK2 and TPR domains  
178 as the major drivers for the assembly of FKBP51- or FKBP52-Hsp90-GR complexes in cells,  
179 while many of the FK1 contacts are dispensable.

180 We further probed representative FKBP51-photoreactive positions in GR for SAFit2  
181 sensitivity. Notably, positions clustering around R614, R655 and E659 were found to be  
182 SAFit2-sensitive (Fig. 4e, g and Extended Data Fig. 6e), whereas crosslinks clustered around

183 helix  $\alpha$ 12 were not affected (Fig. 4f, g and Extended Data Fig. 6e). Together with the ligand  
184 sensitivity findings for FKBP51 (Fig. 4a and b), this suggests that residues around GR  $\alpha$ -helix  
185 12 form an interface with the FK2 and/or TPR domain of FKBP51, while the region around the  
186 tip of  $\alpha$ 5 and the  $\alpha$ 7- $\alpha$ 8 loop of GR contact FKBP51<sup>FK1</sup>, consistent with the rotation postulated  
187 for GR above.

188 To explore the functional consequences of ligand-induced FK1 remodelling, we performed GR  
189 reporter gene assays in HEK293 cells. As previously reported<sup>37</sup>, co-overexpression of FKBP51  
190 reduced GR transactivation. However, the GR-repressing effect of FKBP51 was not affected  
191 by SAFit2 treatment (Fig. 4h), up to a dose >100-fold higher than necessary for FKBP51<sup>FK1</sup>  
192 remodelling (Fig. 4d). The GR-repressing effect of FKBP51 was principally reversible, as  
193 shown by co-overexpression of FKBP52. Similar findings were observed for the bicyclic FKBP  
194 ligand 18<sup>(S)</sup>-Me (Extended Data Fig. 7c). However, the larger macrocyclic ligand FK506<sup>41</sup>,  
195 which protrudes from the FK506-binding site of FKBP51 much more than SAFit2<sup>42</sup> or 18<sup>(S)</sup>-Me  
196<sup>39</sup> (Extended Data Fig. 7c), reverted FKBP51-induced GR-suppression at doses consistent with  
197 intracellular FKBP51 occupancy<sup>40</sup> (Fig. 4i).

198 Collectively, these findings show that the FK506-binding site itself is not required for the GR-  
199 suppressing effect of FKBP51 but that larger FKBP ligands can perturb functionally relevant  
200 interactions.

201

## 202 **Discussion**

203 Steroid hormone receptor functioning relies crucially on the Hsp90 chaperone machinery for  
204 loading and activation by hydrophobic steroids. The minimal chaperone machinery, best  
205 defined for GR, consists of five factors (Hsp90, Hsp70, Hsp40, Hop, and p23)<sup>28</sup>. Two key  
206 intermediate states of the basic GR chaperoning cycle have recently been structurally elucidated  
207 by the Agard group<sup>22,23</sup> (Fig. 5), which represent early chaperoning and late activated states,  
208 respectively.



209 Higher eukaryotes have evolved FKBP51 and FKBP52 as additional Hsp90 co-chaperones to  
210 super-regulate steroid receptor signaling, with essential physiological roles in mammals <sup>32</sup>.  
211 While FKBP52s main function seems to be to support optimal receptor activation (incl.  
212 subsequent transport to the nucleus <sup>37,43</sup>), FKBP51 is a GR repressor and key effector of an  
213 ultrashort negative feedback loop <sup>19</sup>. However, how and precisely when FKBP51 acts on GR in  
214 the chaperone cycle has been matter of debate.

215 By using photocrosslinking in intact cells we capture FKBP51 and FKBP52 in their functionally  
216 relevant states, which have so far eluded any purification or reconstitution attempts. The studied  
217 system recapitulates the hallmarks of the FKBP-Hsp90-GR machinery, incl. Hsp90 dependence  
218 and facilitated GR activation by FKBP52 compared to FKBP51. Our results show that in the  
219 absence of hormone FKBP51, FKBP52 as well as p23 predominantly reside in apoGR-Hsp90  
220 containing complexes in human cells (Fig. 5a–c). These states can either progress towards  
221 activation by GR ligand stimulation or recycle through the Hsp90 machinery. Both of these  
222 processes are fast (<10min, Extended Data Fig. 5I) and complete. We show that either pathway  
223 leads to complete disassembly of the entire complex, since none of the investigated interactions  
224 survived as long as hormone stimulation persists or reassembly, respectively, is blocked.

225 Our findings do not exclude the existence of FKBP-Hsp90 complexes with activated, ligand-  
226 bound GR, which were previously suggested especially for FKBP52 <sup>33,44</sup>. However, these  
227 complexes are likely short-lived in cells and quickly disassemble after the (co)-chaperone  
228 machinery has done its job to deliver activated GR.

229 Our results also provide a picture for the overall architecture of the relevant FKBP/p23-Hsp90-  
230 apoGR pre-activation complexes (Fig 5). The p23-Hsp90-apoGR complex resembles the  
231 maturation complex (p23-Hsp90-GR<sup>Dex-bound</sup>) <sup>23</sup> elucidated by cryo-EM. For FKBP-containing  
232 complexes, the GR has to rearrange, e.g., by rotation of the GR<sup>LBD</sup>, which stays tethered to the  
233 client-binding channel of Hsp90 via pre-helix  $\alpha$ 1 of GR. This rotation will abrogate p23-GR  
234 contacts observed in the absence of FKBP51 (Fig. 2e and Ref 23 ), which may be partially

235 replaced by contacts with the tip of FKBP51. FKBP51, FKBP52, and p23 are likely inter-  
236 exchangeable in the Hsp90-apoGR complex, either directly at preassembled Hsp90-apoGR  
237 complexes or via Hsp90/Hsp70/Hsp40/Hop-mediated dis- and reassembly.

238 Our results confirm the ligand binding domain of GR as the predominant interaction site for  
239 FKBP51, in line with prior studies <sup>36</sup>, and clearly show that FKBP51 and FKBP52 engage in  
240 extensive contacts with GR<sup>LBD</sup>. The identified FKBP→GR interaction surface is largely  
241 consistent with the conformation of FKBP51 bound to Hsp90 in the absence of GR <sup>29</sup> and  
242 requires only minor rearrangements of the FK1 and FK2 domains. The GR has to reorient more  
243 profoundly compared to available structures <sup>22,23</sup> to allow for the observed interaction surface.

244 FKBP51 wraps around the GR<sup>LBD</sup> from helix  $\alpha$ 12 to the  $\alpha$ 7- $\alpha$ 8 loop, covering the  $\alpha$ 1- $\alpha$ 3 loop,  
245 where mutations were previously shown enhance GR repression by FKBP51 <sup>45</sup>.

246 A key question is how FKBP51 and FKBP52 exert strikingly opposing effects on GR signaling  
247 in spite of high structural and sequence similarity. In line with their similarities, most of the  
248 GR-interacting interface is identical between FKBP51 and FKBP52. While the inter-domain  
249 arrangements of FKBP52 were shown to be flexible <sup>21</sup>, it is now clear that FKBP51 and  
250 FKBP52 adopt an almost identical conformation in complex with Hsp90-apoGR. Previous  
251 domain swapping analyses pointed to the FK1 domain as a major factor underlying the opposing  
252 effects of FKBP51 and FKBP52. Indeed, the most diverging GR interaction pattern was located  
253 around the FK506-binding site (Fig. 1b and d), especially in the proline-rich loop overhanging  
254 this site (P109-P124, Extended Data Fig. 8). Intriguingly, swapping L119 in FKBP51 for P119  
255 as in FKBP52 was previously shown to impart GR-stimulating activity to FKBP51 <sup>35</sup>. Crystal  
256 structures previously showed the proline-rich loop to be flexible in FKBP51 <sup>30,38,46</sup> as well as  
257 in FKBP52 <sup>38,47</sup>, and NMR studies suggested differential dynamics of this loop as well as the  
258 beta bulge on the opposite side of the FK506-binding pocket to account for the diverging effects  
259 of the large FKBP51s for GR regulation <sup>48</sup>.

260 The precise role of FKBP51<sup>FK1</sup> and FKBP52<sup>FK1</sup> has important implications for FKBP-directed

261 drug discovery but previous pharmacological studies have been inconclusive<sup>44,49,50</sup>. We show  
262 that compounds binding to the FK506-binding site of FKBP51 or FKBP52 clearly remodel the  
263 contacts between the FK1 domain and GR, while sparing the docking of the GR to the FK2 and  
264 TPR domains. For smaller ligands, the remaining FK1 domain contacts are sufficient to  
265 maintain the GR-suppressive effect of FKBP51 (Fig. 5e). Larger ligands, however, are more  
266 disruptive and abolish the GR-suppressive effect of FKBP51 (Fig. 5f).

267 Our proposed binding modes for the FKBP-Hsp90-apoGR preactivation complexes are  
268 remarkable consistent with two structures for the related complexes containing Dex-bound GR,  
269 recently obtained by the Agard group by cryoEM after *in vitro* reconstitution (Noddings *et al.*,  
270 submitted). Shared features are the intensive contacts of all three FKBP domains with GR<sup>LBD</sup>,  
271 the highly similar interaction pattern for FKBP51 and FKBP52, the rotation of GR<sup>LBD</sup> compared  
272 to the p23-Hsp90-GR<sup>LBD+Dex</sup> complex, the stronger, well defined docking of the FK2 and TPR  
273 domains to GR<sup>LBD</sup> compared to a more dynamic, partially displaceable FK1-GR<sup>LBD</sup> interaction,  
274 and conclusions regarding the role of the FK506-binding sites. The observed interdomain  
275 assembly seems to be a strong scaffold that can accommodate GR in pre- and post-activation  
276 states.

277 Systematic site-specific incorporation of photoreactive unnatural amino acids has been used  
278 before to probe interactions of small or peptide ligands with receptors in mammalian cells<sup>51-54</sup>  
279 or between proteins in yeast, *E.coli* or *in vitro*<sup>55,56</sup>. However, to the best of our knowledge this  
280 is the first example, where the architecture of a multi-protein complex has been determined  
281 directly in intact mammalian cells. Notably, this enables determination of apoGR-containing  
282 complexes that so far have eluded any biochemical purification or reconstitution attempts. The  
283 streamlining of large-scale photocrosslinking screening (>600 tested positions) allowed to  
284 reconstruct the overall architecture of metastable complexes that have eluded structural or  
285 tailored functional studies so far. Moreover, the use of proximity sensors enabled to trace the  
286 remodelling of complexes at much higher detail than previously possible in cells. Systematic

287 surface mapping might be a general approach for low-resolution in-cell structural biology that  
288 is poised to interface with functional cellular studies.

289 Taken together, we capture FKBP51 and FKBP52 in the states of GR suppression and pre-  
290 activation, respectively, thought to be crucial for stress reactivity regulation in humans and for  
291 sexual development in mammals. The proposed interaction modes are extendable to other  
292 FKBP-regulated steroid hormone receptors such as progesterone, estrogen or androgen  
293 receptors, with important implications for breast and prostate cancers<sup>13,14</sup>. We define the overall  
294 architecture of the FKBP-apoGR complexes and provide the rationale for developing FKBP-  
295 directed ligands with higher levels of efficacy.

## 296 References

- 297 1. Storer, C. L., Dickey, C. A., Galigniana, M. D., Rein, T. & Cox, M. B. FKBP51 and  
298 FKBP52 in signaling and disease. *Trends Endocrinol. Metab.* **22**, 481–490 (2011).
- 299 2. Ratajczak, T. Steroid receptor-associated immunophilins: candidates for diverse drug-  
300 targeting approaches in disease. *Curr. Mol. Pharmacol.* **9**, 66–95 (2016).
- 301 3. Cioffi, D. L., Hubler, T. R. & Scammell, J. G. Organization and function of the  
302 FKBP52 and FKBP51 genes. *Curr. Opin. Pharmacol.* **11**, 308–313 (2011).
- 303 4. Smedlund, K. B., Sanchez, E. R. & Hinds Jr, T. D. FKBP51 and the molecular  
304 chaperoning of metabolism. *Trends Endocrinol. Metab.* **32**, 862–874 (2021).
- 305 5. Fries, G. R., Gassen, N. C. & Rein, T. The FKBP51 glucocorticoid receptor co-  
306 chaperone: regulation, function, and implications in health and disease. *Int. J. Mol. Sci.*  
307 **18**, 2614 (2017).
- 308 6. Sivils, J. C., Storer, C. L., Galigniana, M. D. & Cox, M. B. Regulation of steroid  
309 hormone receptor function by the 52-kDa FK506-binding protein (FKBP52). *Curr.*  
310 *Opin. Pharmacol.* **11**, 314–319 (2011).
- 311 7. Guy, N. C., Garcia, Y. A., Sivils, J. C., Galigniana, M. D. & Cox, M. B. Functions of  
312 the Hsp90-binding FKBP immunophilins. *Netw. Chaperones by Co-chaperones* 35–68  
313 (2015).
- 314 8. Nguyen, T. A., Cigler, M. & Lang, K. Expanding the Genetic Code to Study Protein–  
315 Protein Interactions. *Angew. Chemie - Int. Ed.* **57**, 14350–14361 (2018).
- 316 9. Coin, I. Application of non-canonical crosslinking amino acids to study protein–protein  
317 interactions in live cells. *Current Opinion in Chemical Biology* (2018)  
318 doi:10.1016/j.cbpa.2018.07.019.
- 319 10. Prodromou, C. & Bjorklund, D. M. Advances towards Understanding the Mechanism  
320 of Action of the Hsp90 Complex. *Biomolecules* **12**, 600 (2022).
- 321 11. Schopf, F. H., Biebl, M. M. & Buchner, J. The HSP90 chaperone machinery. *Nature*  
322 *Reviews Molecular Cell Biology* (2017) doi:10.1038/nrm.2017.20.
- 323 12. Sanchez, E. R. Chaperoning steroidal physiology: lessons from mouse genetic models  
324 of Hsp90 and its cochaperones. *Biochim. Biophys. Acta (BBA)-Molecular Cell Res.*  
325 **1823**, 722–729 (2012).
- 326 13. Maeda, K. *et al.* FKBP51 and FKBP52 regulate androgen receptor dimerization and  
327 proliferation in prostate cancer cells. *Mol. Oncol.* **16**, 940–956 (2022).
- 328 14. Habara, M. *et al.* FKBP52 and FKBP51 differentially regulate the stability of estrogen  
329 receptor in breast cancer. *Proc. Natl. Acad. Sci.* **119**, e2110256119 (2022).
- 330 15. Balsevich, G. *et al.* Stress-responsive FKBP51 regulates AKT2-AS160 signaling and  
331 metabolic function. *Nat. Commun.* (2017) doi:10.1038/s41467-017-01783-y.
- 332 16. Maiarù, M. *et al.* The stress regulator FKBP51: A novel and promising druggable  
333 target for the treatment of persistent pain states across sexes. *Sci. Transl. Med.* **8**,  
334 325ra19-325ra19 (2016).
- 335 17. Touma, C. *et al.* FK506 binding protein 5 shapes stress responsiveness: modulation of  
336 neuroendocrine reactivity and coping behavior. *Biol. Psychiatry* **70**, 928–936 (2011).

- 337 18. O’Leary III, J. C. *et al.* A new anti-depressive strategy for the elderly: ablation of  
338 FKBP5/FKBP51. *PLoS One* **6**, e24840 (2011).
- 339 19. Jääskeläinen, T., Makkonen, H. & Palvimo, J. J. Steroid up-regulation of FKBP51 and  
340 its role in hormone signaling. *Curr. Opin. Pharmacol.* **11**, 326–331 (2011).
- 341 20. Zannas, A. S., Wiechmann, T., Gassen, N. C. & Binder, E. B. Gene–stress–epigenetic  
342 regulation of FKBP5: clinical and translational implications.  
343 *Neuropsychopharmacology* **41**, 261–274 (2016).
- 344 21. Hähle, A., Merz, S., Meyners, C. & Hausch, F. The many faces of FKBP51.  
345 *Biomolecules* **9**, 35 (2019).
- 346 22. Wang, R. Y.-R. *et al.* Structure of Hsp90–Hsp70–Hop–GR reveals the Hsp90 client-  
347 loading mechanism. *Nature* **601**, 460–464 (2022).
- 348 23. Noddings, C. M., Wang, R. Y.-R., Johnson, J. L. & Agard, D. A. Structure of Hsp90–  
349 p23–GR reveals the Hsp90 client-remodelling mechanism. *Nature* **601**, 465–469  
350 (2022).
- 351 24. Biebl, M. M. *et al.* Structural elements in the flexible tail of the co-chaperone p23  
352 coordinate client binding and progression of the Hsp90 chaperone cycle. *Nat. Commun.*  
353 **12**, (2021).
- 354 25. Biebl, M. M. *et al.* NudC guides client transfer between the Hsp40/70 and Hsp90  
355 chaperone systems. *Mol. Cell* **82**, 555–569 (2022).
- 356 26. Gruszczuk, J. *et al.* Cryo-EM structure of the agonist-bound Hsp90-XAP2-AHR  
357 complex. *bioRxiv* (2022).
- 358 27. Smith, D. F. & Toft, D. O. Minireview: the intersection of steroid receptors with  
359 molecular chaperones: observations and questions. *Mol. Endocrinol.* **22**, 2229–2240  
360 (2008).
- 361 28. Kirschke, E., Goswami, D., Southworth, D., Griffin, P. R. & Agard, D. A.  
362 Glucocorticoid receptor function regulated by coordinated action of the Hsp90 and  
363 Hsp70 chaperone cycles. *Cell* (2014) doi:10.1016/j.cell.2014.04.038.
- 364 29. Lee, K. *et al.* The structure of an Hsp90-immunophilin complex reveals cochaperone  
365 recognition of the client maturation state. *Mol. Cell* **81**, 3496–3508 (2021).
- 366 30. Kumar, R., Moche, M., Winblad, B. & Pavlov, P. F. Combined x-ray crystallography  
367 and computational modeling approach to investigate the Hsp90 C-terminal peptide  
368 binding to FKBP51. *Sci. Rep.* **7**, 14288 (2017).
- 369 31. Püllmann, P. *et al.* Golden Mutagenesis: An efficient multi-site-saturation mutagenesis  
370 approach by Golden Gate cloning with automated primer design. *Sci. Rep.* (2019)  
371 doi:10.1038/s41598-019-47376-1.
- 372 32. Biebl, M. M. & Buchner, J. Structure, function, and regulation of the hsp90 machinery.  
373 *Cold Spring Harb. Perspect. Biol.* **11**, a034017 (2019).
- 374 33. Davies, T. H., Ning, Y.-M. & Sánchez, E. R. A new first step in activation of steroid  
375 receptors: hormone-induced switching of FKBP51 and FKBP52 immunophilins. *J.*  
376 *Biol. Chem.* **277**, 4597–4600 (2002).
- 377 34. Kauppi, B. *et al.* The three-dimensional structures of antagonistic and agonistic forms  
378 of the glucocorticoid receptor ligand-binding domain: RU-486 induces a

- 379 transconformation that leads to active antagonism. *J. Biol. Chem.* **278**, 22748–22754  
380 (2003).
- 381 35. Riggs, D. L. *et al.* Noncatalytic role of the FKBP52 peptidyl-prolyl isomerase domain  
382 in the regulation of steroid hormone signaling. *Mol. Cell. Biol.* **27**, 8658–8669 (2007).
- 383 36. Riggs, D. L. *et al.* The Hsp90-binding peptidylprolyl isomerase FKBP52 potentiates  
384 glucocorticoid signaling in vivo. *EMBO J.* **22**, 1158–1167 (2003).
- 385 37. Wochnik, G. M. *et al.* FK506-binding proteins 51 and 52 differentially regulate dynein  
386 interaction and nuclear translocation of the glucocorticoid receptor in mammalian cells.  
387 *J. Biol. Chem.* **280**, 4609–4616 (2005).
- 388 38. Gaali, S. *et al.* Selective inhibitors of the FK506-binding protein 51 by induced fit. *Nat.*  
389 *Chem. Biol.* **11**, 33 (2015).
- 390 39. Kolos, J. M. *et al.* Picomolar FKBP inhibitors enabled by a single water-displacing  
391 methyl group in bicyclic [4.3. 1] aza-amides. *Chem. Sci.* **12**, 14758–14765 (2021).
- 392 40. Gnatzy, M. T. *et al.* Development of NanoBRET-Binding Assays for FKBP-Ligand  
393 Profiling in Living Cells. *ChemBioChem* **22**, 2257–2261 (2021).
- 394 41. Bracher, A., Kozany, C., Thost, A.-K. & Hausch, F. Structural characterization of the  
395 PPIase domain of FKBP51, a cochaperone of human Hsp90. *Acta Crystallogr. Sect. D*  
396 *Biol. Crystallogr.* **67**, 549–559 (2011).
- 397 42. Draxler, S. W. *et al.* Hybrid screening approach for very small fragments: X-Ray and  
398 computational screening on FKBP51. *J. Med. Chem.* **63**, 5856–5864 (2020).
- 399 43. Silverstein, A. M. *et al.* Different regions of the immunophilin FKBP52 determine its  
400 association with the glucocorticoid receptor, hsp90, and cytoplasmic dynein. *J. Biol.*  
401 *Chem.* **274**, 36980–36986 (1999).
- 402 44. Davies, T. H., Ning, Y.-M. & Sánchez, E. R. Differential control of glucocorticoid  
403 receptor hormone-binding function by tetratricopeptide repeat (TPR) proteins and the  
404 immunosuppressive ligand FK506. *Biochemistry* **44**, 2030–2038 (2005).
- 405 45. Cluning, C. *et al.* The helix 1-3 loop in the glucocorticoid receptor LBD is a regulatory  
406 element for FKBP cochaperones. *Mol. Endocrinol.* **27**, 1020–1035 (2013).
- 407 46. Sinars, C. R. *et al.* Structure of the large FK506-binding protein FKBP51, an Hsp90-  
408 binding protein and a component of steroid receptor complexes. *Proc. Natl. Acad. Sci.*  
409 *U. S. A.* **100**, 868–873 (2003).
- 410 47. Bracher, A. *et al.* Crystal structures of the free and ligand-bound FK1–FK2 domain  
411 segment of FKBP52 reveal a flexible inter-domain hinge. *J. Mol. Biol.* **425**, 4134–4144  
412 (2013).
- 413 48. LeMaster, D. M. *et al.* Coupling of conformational transitions in the N-terminal  
414 domain of the 51-kDa FK506-binding protein (FKBP51) near its site of interaction  
415 with the steroid receptor proteins. *J. Biol. Chem.* **290**, 15746–15757 (2015).
- 416 49. Reynolds, P. D., Ruan, Y., Smith, D. F. & Scammell, J. G. Glucocorticoid resistance in  
417 the squirrel monkey is associated with overexpression of the immunophilin FKBP51. *J.*  
418 *Clin. Endocrinol. Metab.* **84**, 663–669 (1999).
- 419 50. Denny, W. B., Valentine, D. L., Reynolds, P. D., Smith, D. F. & Scammell, J. G.  
420 Squirrel monkey immunophilin FKBP51 is a potent inhibitor of glucocorticoid receptor

- 421 binding. *Endocrinology* **141**, 4107–4113 (2000).
- 422 51. Grunbeck, A., Huber, T., Sachdev, P. & Sakmar, T. P. Mapping the ligand-binding site  
423 on a G protein-coupled receptor (GPCR) using genetically encoded photocrosslinkers.  
424 *Biochemistry* **50**, 3411–3413 (2011).
- 425 52. Rannversson, H. *et al.* Genetically encoded photocrosslinkers locate the high-affinity  
426 binding site of antidepressant drugs in the human serotonin transporter. *Nat. Commun.*  
427 **7**, 1–9 (2016).
- 428 53. Rudolf, S. *et al.* Binding of Natural Peptide Ligands to the Neuropeptide Y5 Receptor.  
429 *Angew. Chemie Int. Ed.* **61**, e202108738 (2022).
- 430 54. Coin, I. *et al.* Genetically encoded chemical probes in cells reveal the binding path of  
431 urocortin-I to CRF class B GPCR. *Cell* **155**, 1258–1269 (2013).
- 432 55. Wilkins, B. J. *et al.* A cascade of histone modifications induces chromatin  
433 condensation in mitosis. *Science (80-. )*. **343**, 77–80 (2014).
- 434 56. Kashiwagi, K. *et al.* Crystal structure of eukaryotic translation initiation factor 2B.  
435 *Nature* **531**, 122–125 (2016).
- 436
- 437



438 **Methods:**

439 **Golden Gate reaction**

440 All Golden Gate reactions were performed as describe in Püllmann et al.<sup>1</sup> PCR reactions were  
441 carried out using standardized conditions in a 96-well format to generate a fragment 1 and a  
442 fragment 2 for each mutant. The final Golden Gate reaction volume contained 1× concentrated  
443 T4 ligase buffer (NEB), 250 ng Golden Gate vector (pcDNA3-based carrying a twin Strep-  
444 FLAG tag, synthesized by BioCat, Heidelberg, Germany) 2 U BSA HFv2 (NEB), 1 U T4 ligase  
445 (NEB) and the fragment 1 & 2 for each mutant. Golden Gate reactions were carried out in a 96-  
446 well plate (30 cycles of 3 min 37°C (enzymatic digest) and 3 min 16°C (ligation reaction),  
447 followed by a final restriction step 3 min 37°C before the heat inactivation 20 min 80°C),  
448 followed by transformation into chemocompetent *E. coli* DH5α cells (NEB) by heat shock  
449 procedure. Selected mutants were sequenced to ensure the side specific mutation.

450

451 **Amber suppression**

452 Amber suppression was carried out using a modified protocol of Serfling & Coin<sup>2</sup>. Cell culture  
453 experiments were performed with Human embryonic kidney (HEK) 293 cells that were cultured  
454 in Dulbecco's modified Eagle's medium (DMEM) with 10% fetal bovine serum (FBS) and 1%  
455 penicillin-streptomycin solution at 37°C with 5% CO<sub>2</sub>. Cells were grown overnight to 50%  
456 confluence. Transfection was performed according to Lipofectamin 2000 (Invitrogen) cell  
457 transfection protocol. The transfection mix contained the pBpa tRNA synthetase  
458 p\_NEU\_EBpaRS\_4xBstYam and four copies of U6-BstYam expression cassettes<sup>2</sup> (kind gift  
459 of Irene Coin, Leipzig) and the corresponding TAG mutant of either FKBP51, FKBP52, or GR.  
460 pBpa (Thermo Scientific) was added to the media at a concentration of 500 μM. The cells were  
461 incubated for 42 h to allow for expression of pBpa-containing proteins, followed by optional  
462 pharmacological treatment (as indicated in the figures), and UV-irradiated for 30 min on ice.

463

464 **Western blot**

465 Cells were lysed in NETN buffer (100 mM NaCl, 20 mM Tris pH 8, 0.5 mM EDTA, 0.5 %  
466 Nonidet P-40, protease inhibitor cocktail (Roche)). The proteins were separated by SDS-PAGE  
467 and transferred to a nitrocellulose membrane (Amersham). The protein on the membrane were  
468 probed with antibodies (either anti-HA (Roche), -FLAG (Sigma), or -p23 (SCBT)) and detected  
469 with Immobilon Western (Millipore). The band intensity was measured with an image analyzer  
470 (Fuji Photo Film).

471

## 472 **ELISA**

473 ELISA plates (Maxisorp, 96 well plate, Invitrogen) were coated with 100  $\mu$ L of 7.5 ng/ $\mu$ L  
474 Streptactin (IBA) in PBS and the plates were incubated at 4°C overnight. Plates were washed  
475 with PBS/0.05% Tween20 (ELISA washer: BioTek ELx405 Select CW) and blocked with 5%  
476 milk powder in TBS at 4°C overnight. Plates were washed with PBS/0.05% Tween20 and plates  
477 were stored at 4°C. For ELISA, 70  $\mu$ L PBS was added to each well. 30  $\mu$ L of cell lysate were  
478 added and the plate was incubated at 4° C overnight. ELISA plates were washed with  
479 PBS/0.05% Tween20. Then, the antibody solution (1:5000 anti-FLAG in 5% BSA in 1 $\times$ TBST  
480 or 1:1000 anti-HA in PBS) were added and the plate was incubated for 2 h at room temperature.  
481 Plates were again washed and the TMB substrate (ThermoFisher) were added. After 10 min  
482 incubation in the dark, the enzymatic reaction was quenched by adding 0.18 M H<sub>2</sub>SO<sub>4</sub>.  
483 Absorption at 450 nm was measured (Tecan Spark). Data were analysed with GraphPad Prism  
484 9.

485

## 486 **Reporter Gene Assays**

487 Prior to transfection HEK293 cells were seeded at a density of 1 $\times$ 10<sup>4</sup> per well in poly-D-lysine  
488 coated 96 well plates. After overnight attachment the dual reporter plasmids (pGL4.36,  
489 pGL4.74 (Promega)), prK5-HA-GR as well as prK5-FKBP51-Flag and prK5-FKBP52-Flag  
490 were introduced by polyethyleneimine-mediated transient transfection. On the next day, the  
491 cells were stimulated with Dexamethasone and co-treated with FKBP ligands or DMSO for  
492 24 hours. Subsequently, the cells were washed with DBPS and lysed in 60  $\mu$ L Passive lysis  
493 buffer (Promega, E1910). For measurement, 20  $\mu$ L cell lysates were transferred to white 96 half  
494 area plates (Greiner, 675075) and reporter expression was quantified using a Tecan Spark and  
495 Dual-Glo® Luciferase Assay System (Promega, E2920) according to a manufacturers  
496 instruction.

497

## 498 **Methods References**

- 499 1. Püllmann, P. et al. Golden Mutagenesis: An efficient multi-site-saturation  
500 mutagenesis approach by Golden Gate cloning with automated primer design.  
501 Sci. Rep. (2019) doi:10.1038/s41598-019-47376-1.
- 502 2. Serfling, R. & Coin, I. Incorporation of unnatural amino acids into proteins  
503 expressed in mammalian cells. in Methods in enzymology vol. 580 89–107  
504 (Elsevier, 2016).

505

506

507 **Acknowledgements**

508 We thank Martin Weissenborn, Pascal Püllmann, and Chris Ulpinnis (University of  
509 Halle) for suggestions and training on the golden gate mutagenesis protocol, Irene  
510 Coin (University of Leipzig) for plasmids and suggestions for pBpa incorporation in  
511 mammalian cells, and Jürgen Kolos and Tim Heymann for samples of 18<sup>(S)</sup>-Me and  
512 SAFit2, respectively. We are indebted to Malin Wilfinger and Jan-Philip Kahl for the  
513 cloning GR mutants and helping to establish the ELISA and to Francois Halloy for  
514 preliminary work on reporter gene assays. This work was supported by funding from  
515 the HMWK (LOEWE-Schwerpunkt TRABITA) and the BMBF (16GW0290K) to F.H.

516

517 **Author Contributions**

518 A.B & S.E. designed and executed all photocrosslinking experiments and subsequent  
519 analysis. T.M.G performed and analyzed the reporter gene assays. F.H. conceived  
520 the project. All authors interpreted the results, A.B. and F.H. wrote the manuscript,  
521 approved by all authors.

522

523 **Competing interests**

524 The authors declare no competing interests.

525

526 **Additional Information**

527 Correspondence to Felix Hausch ([felix.hausch@tu-darmstadt.de](mailto:felix.hausch@tu-darmstadt.de))

528

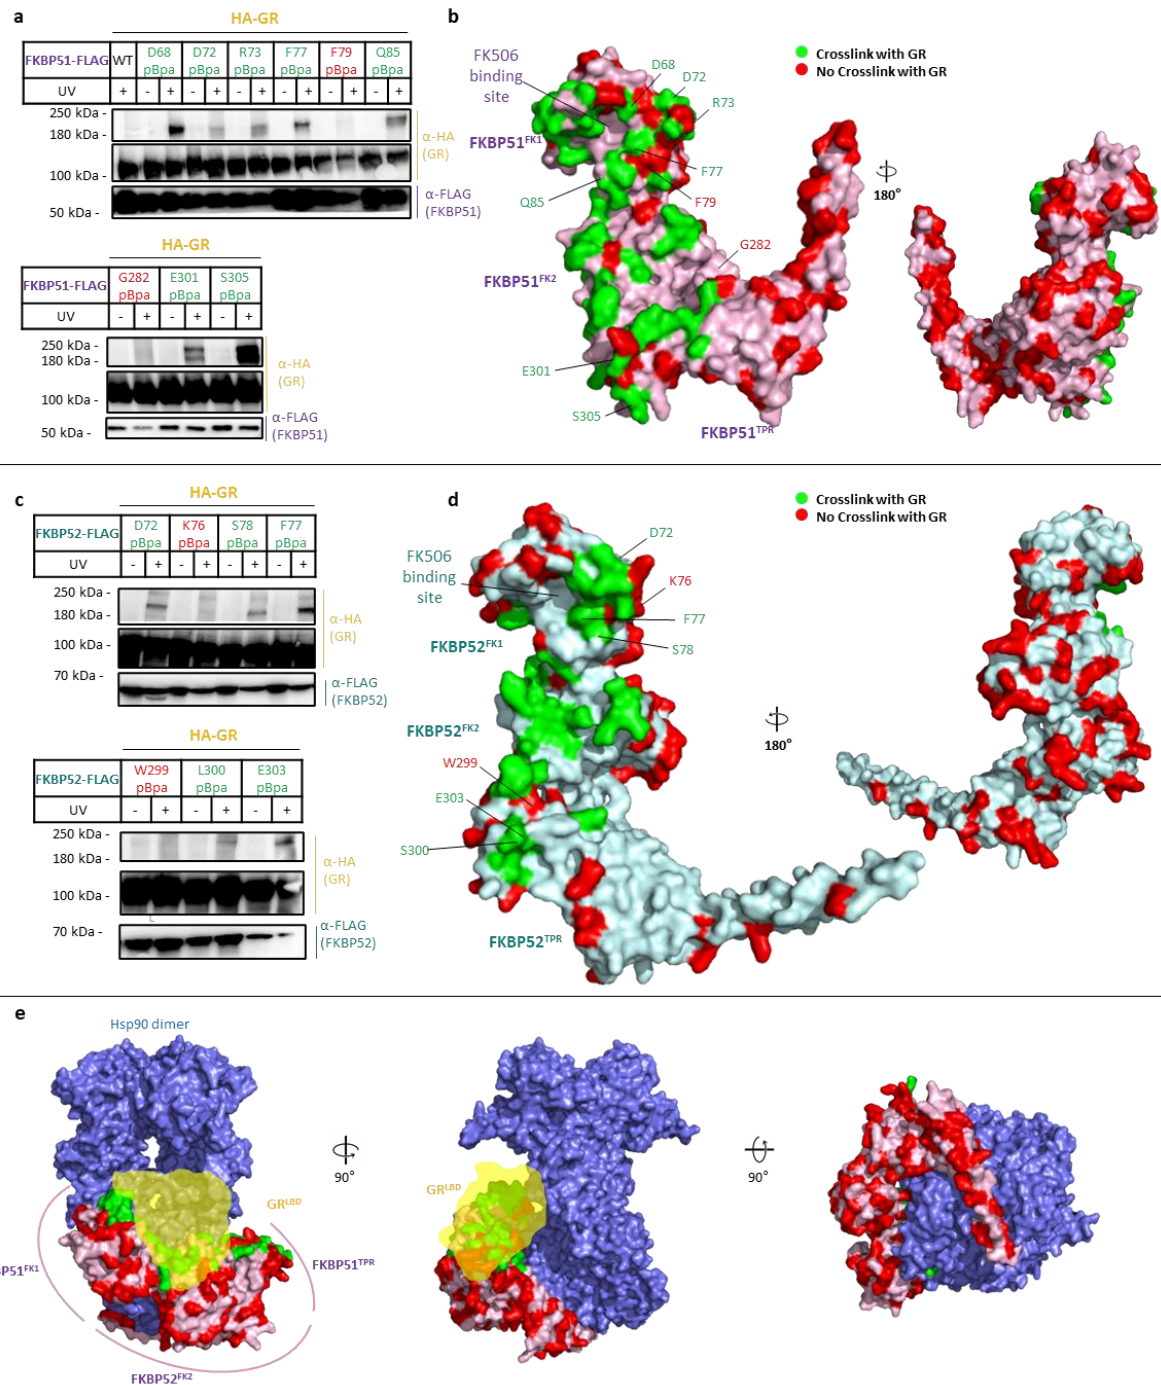

529  
 530 **Fig. 1 Large-scale in-cell photocrosslinking reveals large and defined interaction interfaces of FKBP51 with GR.** **a**,  
 531 Western blots of exemplary FKBP51 pBpa mutants expressed and photocrosslinked in HEK293 cells co-overexpressing HA-  
 532 tagged GR. UV light-induced HA-reactive bands at a size of approx. 180 kDa are indicative of the mutated position being in  
 533 proximity to GR. **b**, GR-photoreactive positions (highlighted in green) and inactive position (shown in red) in FKBP51 (pale pink),  
 534 identified by Western blotting as in **a**, were mapped on the structure of FKBP51 (PDB: 5OMP). **c**, In-cell  
 535 photocrosslinking analysis for FKBP52, performed identical as in **a**. **d**, FKBP52 crosslinks to GR were mapped on the predicted  
 536 FKBP52 structure (AFQ02790). **e**, FKBP51→GR crosslinks are mapped on the Hsp90-FKBP51 complex (PDB: 7J7I, p23  
 537 omitted for clarity) to illustrate the orientation of the FKBP51-GR interaction interface. The broad position of Hsp90-bound  
 538 GR<sup>LBD</sup>, estimated from PDB-ID 7KRI, is indicated as a transparent yellow shape.

539

540

541

542

543

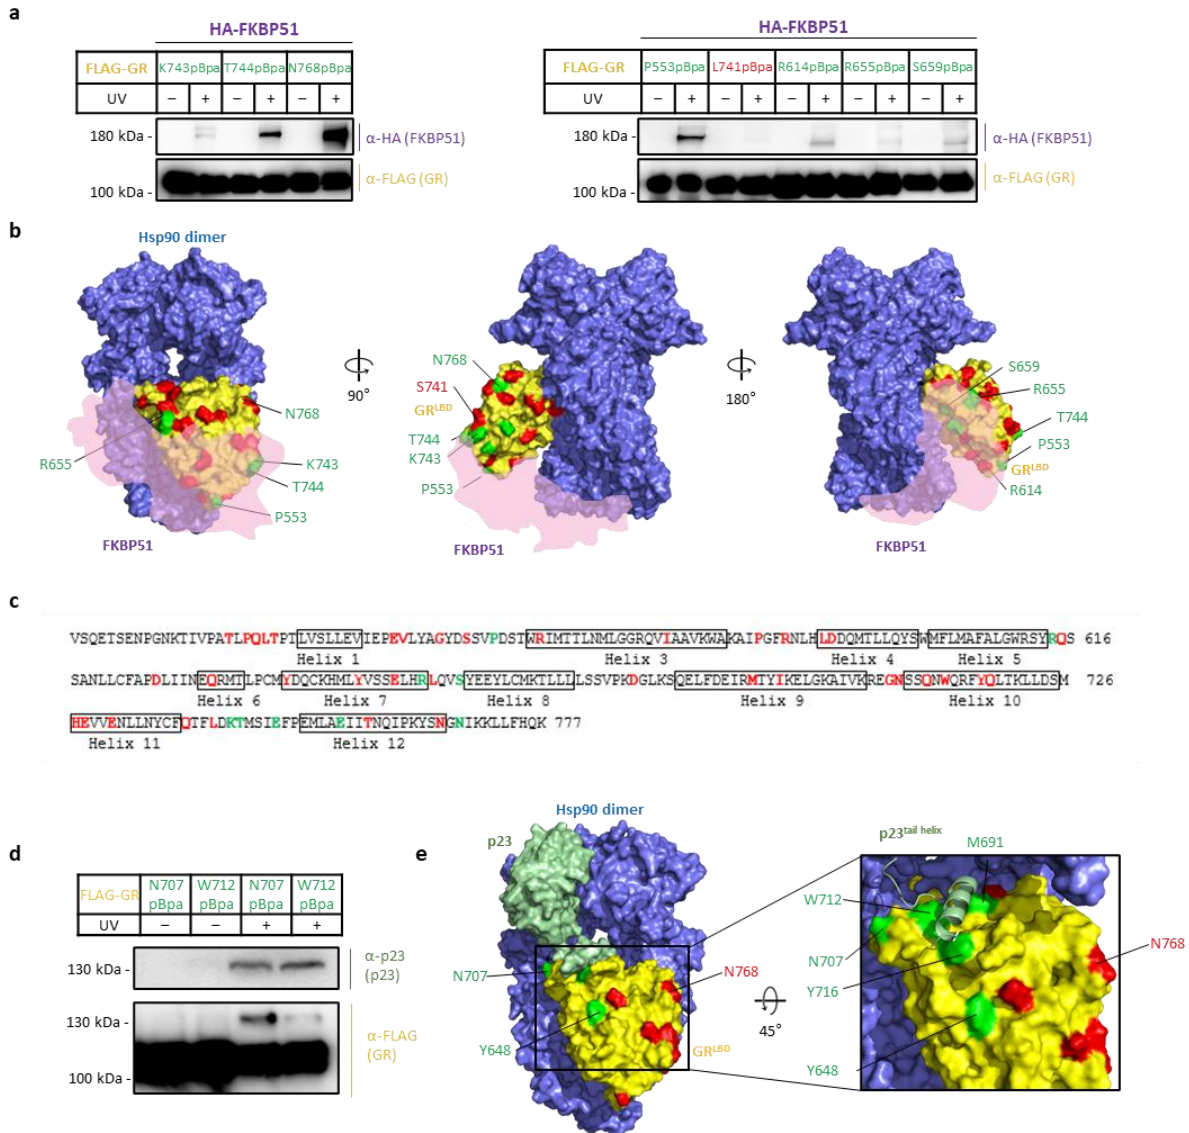

544  
545  
546  
547  
548  
549  
550  
551  
552  
553  
554  
555  
556

**Fig. 2 Large scale photocrosslinking of the full-length GR in mammalian cells confirms the interaction of the GR ligand binding domain and co-chaperones FKBP51 and p23.** **a**, Western blots of exemplary full-length GR pBpa mutants expressed and photocrosslinked in HEK293 cells co-overexpressing HA-tagged FKBP51. UV light-induced HA-reactive bands at a size of approx. 180 kDa are indicative of the mutated position being in proximity to FKBP51. **b**, GR→FKBP51 crosslinks were mapped on the structure of the Hsp90-GR complex (PDB: 7KRJ, p23 omitted for clarity) with crosslinks highlighted in green and inactive position indicated in red. The broad position of Hsp90-bound FKBP51, estimated from PDB-ID 7L71, is indicated as a transparent light pink shape. **c**, Crosslinks or inactive positions are mapped to the sequence of GR<sup>LBD</sup> (523–777), with indication of secondary structure. **d**, Western blots of exemplary full-length GR pBpa mutants expressed and photocrosslinked in HEK293 cells (without FKBP51 co-overexpression). UV light-induced FLAG-reactive bands and p23-reactive bands at a size of 130 kDa are indicative of the mutated position being in proximity to p23. **e**, GR→p23 crosslinks were mapped on the structure of the Hsp90-GR-p23 complex (PDB: 7KRJ) with crosslinks highlighted in green and inactive position indicated in red. In the close-up view the p23tail helix (p23 120-130) is shown as cartoon.

557  
558  
559  
560  
561  
562  
563  
564  
565  
566

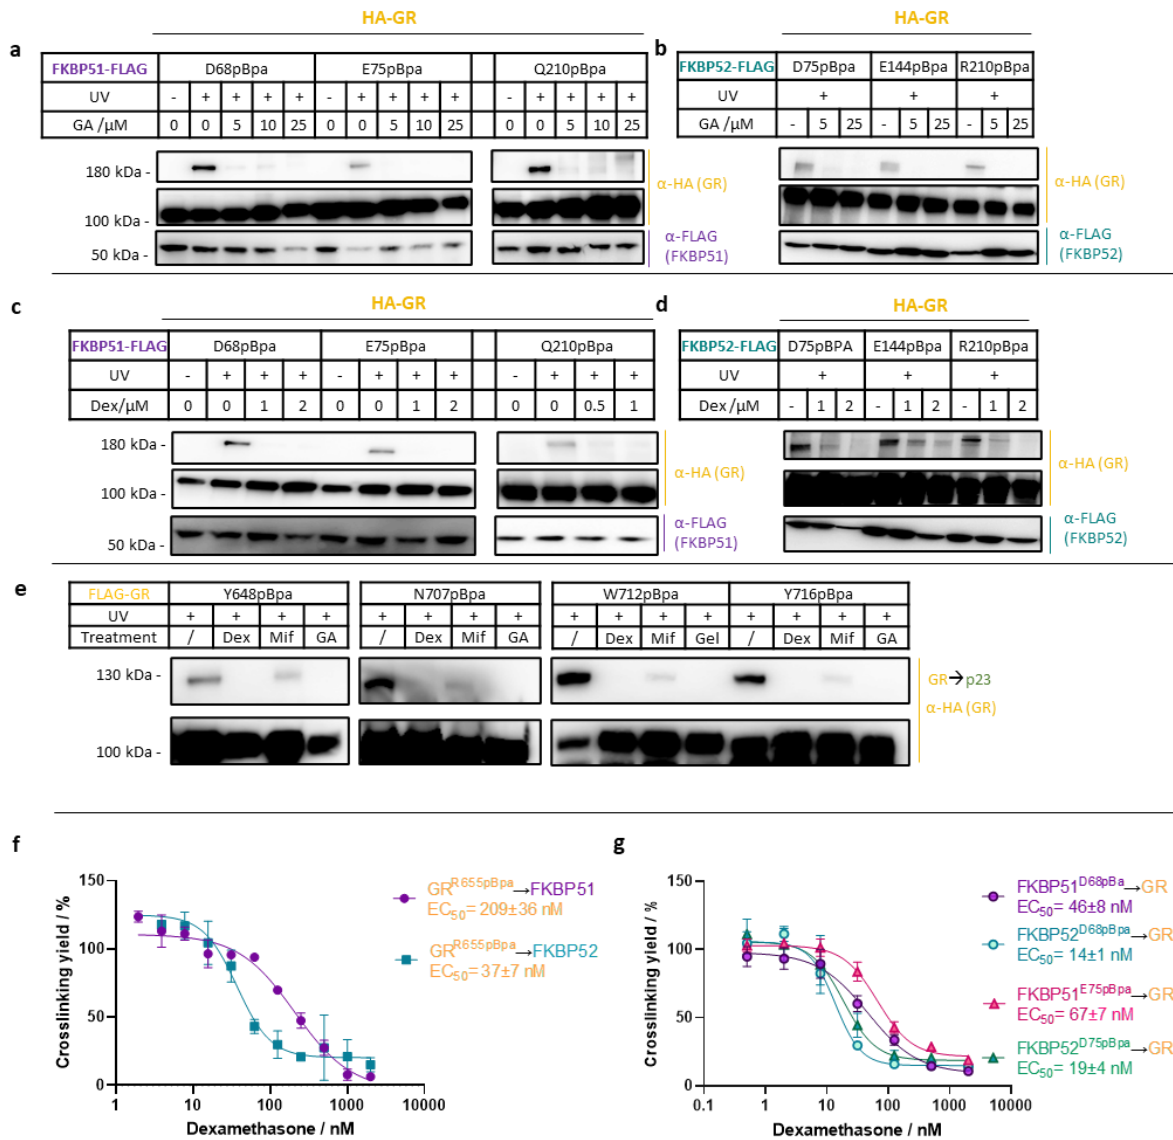

567  
 568 **Fig. 3 FKBP51, FKBP52, and p23 interact with the apoGR in a Hsp90-dependent manner.** **a + b**, Hsp90 inhibitor  
 569 (Geldanamycin, GA) treatment for 1 h disrupts FKBP51→GR (**a**) and FKBP52→GR crosslinks (**b**), suggesting Hsp90-  
 570 dependent interactions. **c + d**, GR agonist (Dexamethasone, Dex) treatment for 1 h disrupts FKBP51→GR (**c**) and  
 571 FKBP52→GR crosslinks (**d**), suggesting interactions with the apoGR under basal conditions. **e**, GR agonist (Dexamethasone,  
 572 Dex, 5  $\mu$ M) and Hsp90 inhibitor (Geldanamycin, GA, 5  $\mu$ M) treatment for 1 h disrupts GR→p23 crosslinks; GR antagonist  
 573 (Mifepristone, Mif, 5  $\mu$ M) treatment for 1 h partially disrupts GR→p23 crosslinks. **f**, Dexamethasone dose-dependently  
 574 disrupted the GR→FKBP51 and GR→FKBP52 interaction in cells as determined by ELISA after cellular stimulation for 30  
 575 min, in-cell photocrosslinking and cell lysis. **g**, Dexamethasone disrupts FKBP52→GR complexes more potently compared to  
 576 FKBP51→GR complexes, as determined ELISA after cellular stimulation for 1 h, in-cell photocrosslinking and cell lysis. **f +**  
 577 **g**, For better comparison, the crosslinking yield is shown (mean $\pm$ s.d.) with 0  $\mu$ M Dex=100% crosslinking yield and -UV=0%,  
 578 plot represents data from biological replicates ( $n=3$ ) per concentration. See Extended Data Fig. 5d-g for individual data points.

579  
 580  
 581  
 582  
 583  
 584  
 585  
 586  
 587  
 588

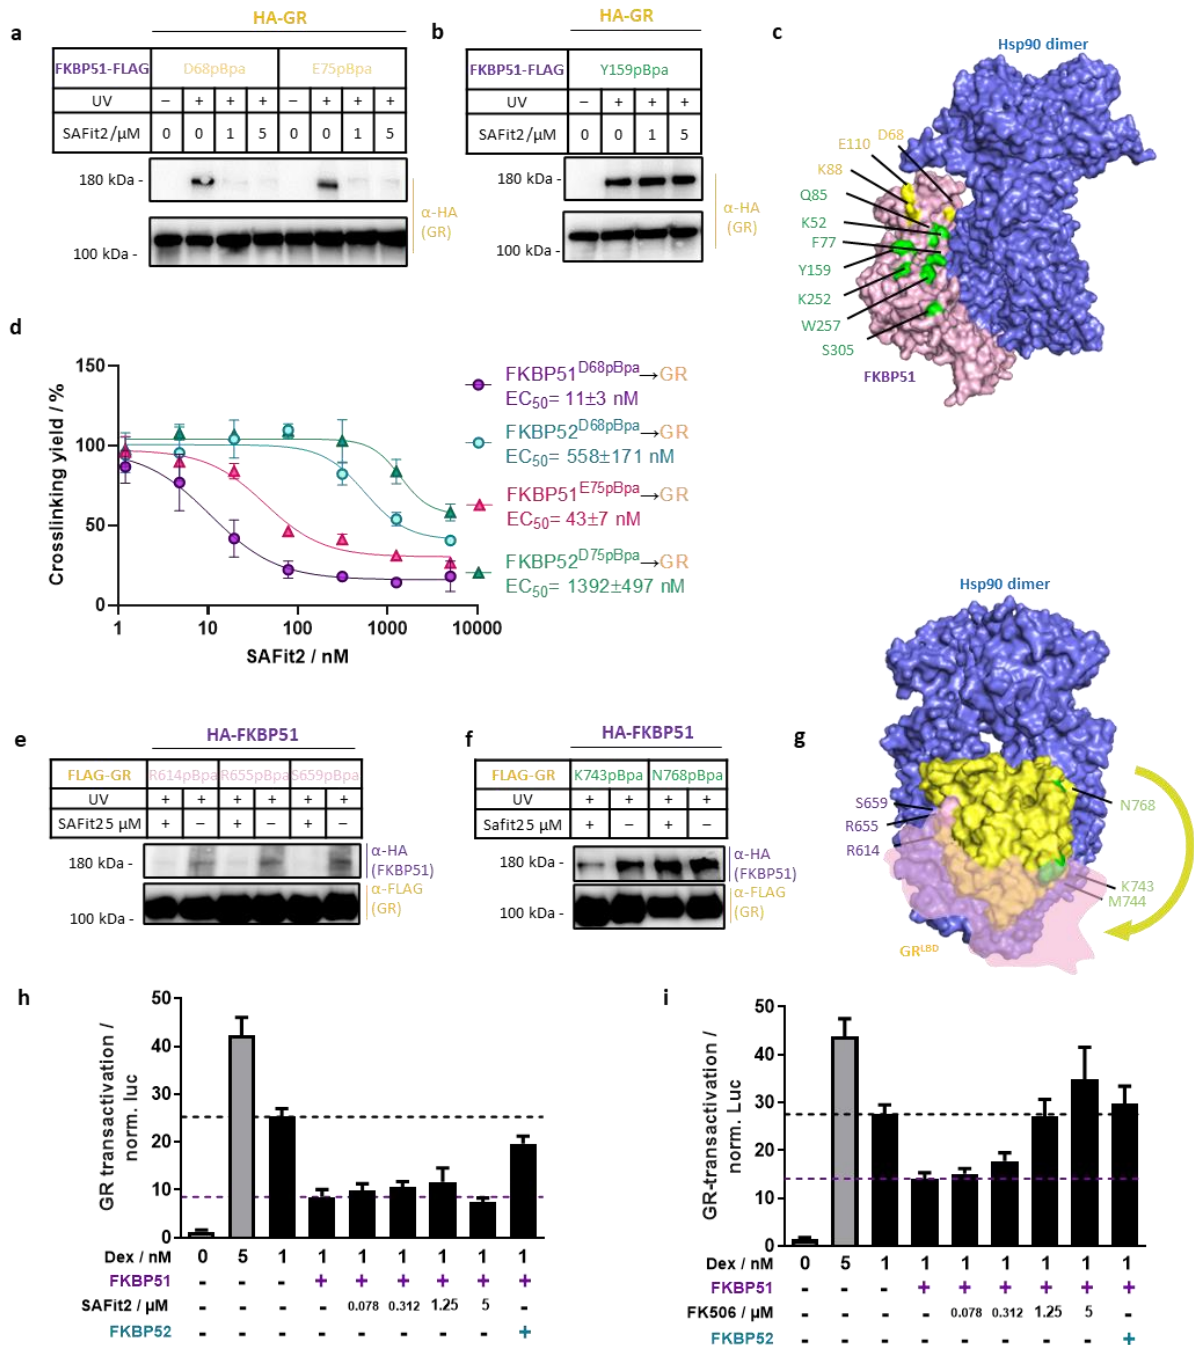

589  
590  
591  
592  
593  
594  
595  
596  
597  
598  
599  
600  
601  
602  
603  
604  
605  
606  
607

**Fig. 4 Inhibition of FKBP51 only partially disrupts FKBP-GR interactions.** **a–c**, Treatment with the FKBP51 inhibitor (SAFit2) for 1 h disrupts FKBP51→GR crosslinks in the FK1 (**a**) but not the FK2 (**b**) and TPR domains. **a + b**, Western blots of exemplary FKBP51 pBpa mutants expressed and photocrosslinked in HEK293 cells co-overexpressing HA-tagged GR. UV light-induced HA-reactive bands at a size of approx. 180 kDa are indicative of the mutated position being in proximity to GR. **c**, FKBP51→GR crosslinks tested for SAFit2 sensitivity were mapped to the structure of the FKBP51-Hsp90 complex (PDB: 7J7I, p23 omitted for clarity). SAFit2-sensitive crosslinks are shown in yellow, SAFit2-insensitive crosslinks (i.e., persisting in the presence of SAFit2) are shown in green. **d**, SAFit2 dose-dependently disrupts photocrosslinking positions in FKBP51<sup>FK1</sup> and FKBP52<sup>FK1</sup>, determined by ELISA. For better comparison, the crosslinking yield is shown (mean±s.d.) with 0  $\mu$ M Dex=100% crosslinking yield and -UV= 0%, plot represents data from biological replicates ( $n=3$ ) per concentration. See Extended Data Fig. 6f + g for individual data points. **e + f**, SAFit2-sensitivity (**e**) or resistance (**f**) of exemplary GR pBpa mutants, detected by Western blots after expression and photocrosslinked in HEK293 cells with co-overexpressing HA-tagged FKBP51. **g**, GR→FKBP51 crosslinks tested for SAFit2 sensitivity were mapped to the structure of the GR-Hsp90 complex (PDB: 7KRJ, p23 omitted for clarity). SAFit2-sensitive crosslinks are shown in pink, SAFit2-insensitive crosslinks (i.e., persisting in the presence of SAFit2) are shown in green. **h + i**, GR transactivation was measured by reporter gene assays (mean±s.d.) in HEK293 cells transiently co-transfected with the dual reporters pGL4.36 (MMTV-luc2p), pGL4.74 (TK-hRLuc) as well as expression plasmids for human GR and optionally FKBP51 and/or a 3-fold excess of FKBP52. See Extended Data Fig. 7a + b for individual data points. Treatment with FK506 (**i**) but not SAFit2 (**h**) dose-dependently blocks FKBP51-induced GR suppression. Data from biological replicates ( $n=6$ ) per concentration.

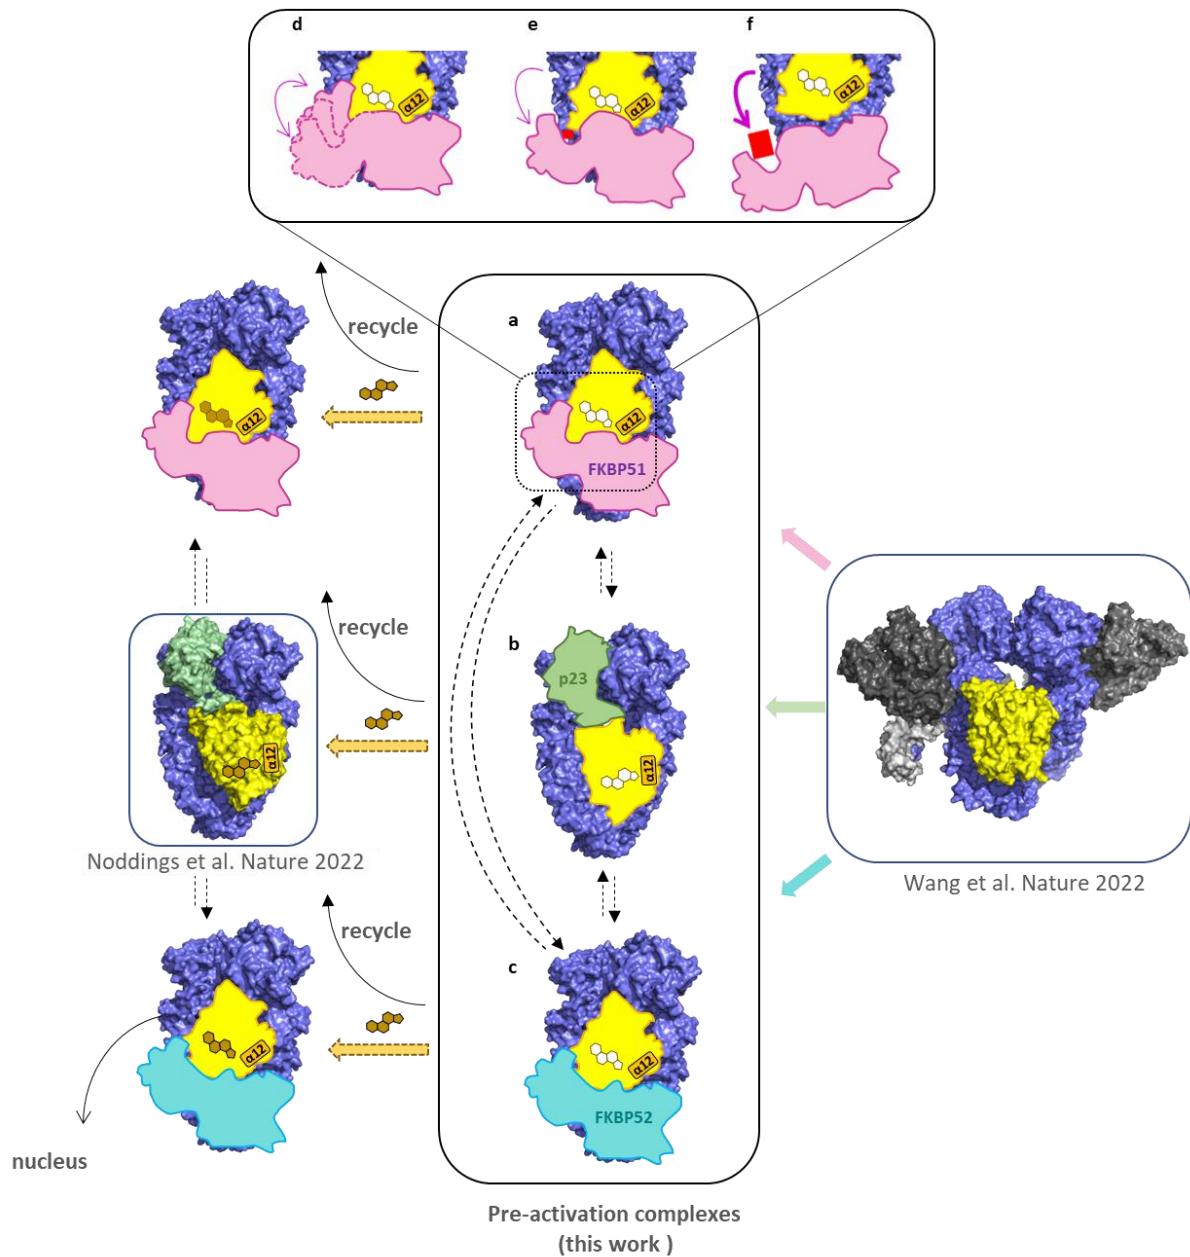

608  
609  
610  
611  
612  
613  
614  
615  
616

**Fig. 5 Co-chaperones preferentially engage apoGR in pre-activation complexes in human cells.** After Hop-mediated transfer from Hsp70 to Hsp90 (right), apoGR transitions further to FKBP51 (a), p23 (b), or FKBP52 (c) containing pre-activation complexes, which represent the predominantly populated FKBP/p23-GR species in cells. The pre-activation complexes can progress by GR ligand activation to Hsp90-cochaperone complexes containing activated GR (right) or recycle by disassembly of the heterocomplexes. **d**, Loops adjacent to the FK506-binding pocket are flexible and contact the GR to regulate GR ligand binding. **e**, smaller FKBP ligands stabilize the loops, disrupt some GR-contacts of the FK1 domain, but spare the GR-regulatory contacts and the association with the FK2 and TPR domains. **f**, Larger FKBP ligands disrupt GR-regulatory contacts.

617  
618  
619  
620  
621  
622  
623
